# Supplementary material for: The Transcription Factor SLUG Uncouples Pancreatic Cancer Progression from the RAF–MEK1/2–ERK1/2 Pathway
Source: Oxford University Press journal article supplement (doi:10.1158/0008-5472.can-20-4263), 2021-04-26
Supplement: 00085472can204263-sup-257754_3_supp_7060764_qrsz59.docx [file 00085472can204263-sup-257754_3_supp_7060764_qrsz59.docx]

Supplementary Figures

The transcription factor Slug uncouples pancreatic cancer progression from the Raf-Mek1/2-Erk1/2 pathway

Faiz Bilal1,4, Enrique J. Arenas1,4, Kim Pedersen1, Alex Martínez-Sabadell1, Behnam Nabet5,6, Elizabeth Guruceaga7, Silvestre Vicent7, Josep Tabernero2,3,4, Teresa Macarulla2,3 and Joaquín Arribas1,4,8,9,10

1 Preclinical and 2 Clinical Research Programs, Vall d’Hebron Institute of Oncology (VHIO), 3 Vall d’Hebron University Hospital (HUVH) and 4 CIBERONC, Barcelona, 08035, Spain.

5 Department of Cancer Biology, Dana-Farber Cancer Institute, Boston, MA 02215, USA.

6 Department of Biological Chemistry and Molecular Pharmacology, Harvard Medical School, Boston, MA 02115, USA.

7 Program in Solid Tumors and Biomarkers, Center for Applied Medical Research, Universidad de Navarra, Pamplona 31008, Spain

8 Department of Biochemistry and Molecular Biology, Universitat Autónoma de Barcelona, Campus de la UAB, 08193, Bellaterra, Spain.

9 Cancer Research Program, IMIM (Hospital del Mar Medical Research Institute), Barcelona, Spain

10 Institució Catalana de Recerca i Estudis Avançats (ICREA), 08010, Barcelona, Spain.

Corresponding Author:

Joaquín Arribas PhD

Vall d'Hebron Institute of Oncology (VHIO)

C/Natzaret, 115-117

Barcelona 08035, Spain

Phone: +34 93 274 6026

E-mail: [jarribas@vhio.net](mailto:jarribas@vhio.net)

**Fig. S1 Characterization of cells resistant to Mek1/2 inhibition**

**A**, Parental MIA PaCa-2 or resistant cells from the indicated clones were treated with different concentrations of Tramentinib. Then, cell numbers were estimated with the crystal violet staining assay.

**B**, The indicated resistant clones were cultured with or without 90 nM MEK162 for three months. Then, cells were treated with different concentrations of MEK162 and analyzed as in A.

**C**, The effect of the Erk1/2 inhibitor SCH77284 on parental and resistant cells was determined as in A.

**D**, Parental MIA PaCa-2 cells or the indicated resistant clones were treated with or without MEK162, lysed and cell lysates analyzed by Western blot with the indicated antibodies.

**E**, Lysates from Parental MIA PaCa-2 cells or cells from the R2-1 resistant clone were analyzed using a human phospho-kinase antibody array. Specific signals were quantified and normalized to the levels in parental cells (blue lines). Signals corresponding to R2-1 lysates are shown as duplicate determinations (black dots) and averages (green lines).

**F**, The effect of the K-RasG12C inhibitor AMG-510 on parental and resistant cells was determined as in A.

Results are presented as mean ± SD.

**Fig. S2 Mutations identified in resistant cells by exome sequencing**

**A**, Venn diagram showing overlap among mutated genes in the two R1 clones and in the three R2 clones.

**B**, Table showing the 41 and 9 genes mutated in the two R1 and three R2 clones, respectively. The mutations in DNA, the corresponding amino acid change and the Polyphen-2 score are shown. Mutations were predicted to have functional effects with scores ≥0.85.

**Fig. S3** **Expression of Slug and markers of EMT in resistant cells and effect of SNAI1 (Snail) and SNAI2 (Slug) expression on sensitivity to Mek1/2 inhibition**

**A**, Parental MIA PaCa-2 cells or the indicated resistant clones were lysed and cell lysates analyzed by Western blot with the indicated antibodies.

**B**, Cultures from the P-PDX #57 were treated during three months with increasing concentrations of MEK162. Left, the sensitivity of the parental and resistant cells was determined with the crystal violet staining assay. Right, Western blot analysis of the expression of Slug in the same cells.

**C**, The expression of the indicated transcription factors were analyzed by RT-qPCR in parental MIA PaCa-2 cells or cells from resistant clones.

**D**, Parental MIA PaCa-2 cells or the indicated resistant clones were lysed and cell lysates analyzed by Western blot with the indicated antibodies.

**E**, The expression of the indicated transcription factors was analyzed by RT-qPCR in parental MIA PaCa-2 cells treated with or without MEK162.

**F**, Left, Western blot analysis of the expression of Snail in parental MIA PaCa-2 cells or the same cells stably transfected with a vector encoding Snail. Right, sensitivity to MEK162 was determined as described in B.

**G**, The levels of Slug were analyzed by RT-qPCR in control resistant cells (none) or in the same cells transduced with lentiviral vectors expressing a non-targeting shRNA (shNT) or shRNAs targeting Slug (sh 239 and sh 298).

**H**, The sensitivity to MEK162 of the same cells as in G was determined as described in B.

Results are presented as mean ± SD.

**Fig. S4** **Generation and characterization of cells resistant to K-RasG12C inhibition**

**A**, Dosages of AMG-510 used to generate resistant cells.

**B**, Parental MIA PaCa-2 cells or cells selected as in A were treated with different concentrations of AMG-510 for 72 hours. Then, cell numbers were estimated with the crystal violet staining assay.

**C**, Parental MIA PaCa-2 cells or AMG-R cells were lysed and cell lysates analyzed by Western blot with the indicated antibodies.

**D**, The levels of Slug were analyzed by Western blot in AMG-R cells transduced with lentiviral vectors expressing a non-targeting shRNA (shNT) or a shRNA targeting Slug (sh 239).

**E**, The same cells as in D were treated with different concentrations of AMG-510 or MEK162. Then, cell numbers were estimated with the crystal violet staining assay.

Results are presented as mean ± SD.

**Fig. S5**. Effect of Slug expression on metastatic growth and pancreatic cancer prognosis

**A**,Luciferase-expressingparental MIA PaCa-2 cells or the same cells stably transfected with a vector encoding Slug were injected subcutaneously into NMRI mice. When tumors reached ~1000 mm3, they were surgically removed and, after 12 weeks, mice were euthanized, tissues were obtained and the presence of metastases was assessed by luminescence.

**B**, The quantification of luminescence in individual metastases is shown.

**C**, Kaplan-Meier survival curves of pancreatic cancer patients included in the TCGA studies and stratified by the expression of the indicated transcription factors.

**D**, Kaplan-Meier survival curves of pancreatic cancer patients excluding patients with high SNAI2 or SNAI1, as indicated.

**Fig. S6 Expression of Slug in P-PDX models of resistance to Mek1/2 inhibition**

**A**, Mice bearing P-PDXs were treated with chemotherapy (Gemcitabine and Nab-Paclitaxel) only or with chemotherapy plus MEK162. At the end of the experiment tumors were weighted (for a detailed description of the experiment and results, see (30)).

**B**, Samples from the tumors quantified in A were stained with anti-Slug antibody and staining was quantified.

**C**, Representative photographs of cultures from the indicated P-PDX stably expressing a non-targeting shRNA (shNT) or a shRNA targeting Slug.

**Fig. S7. Effect of Mek5 or Ekr5 inhibitors on different pancreatic cancer cells and effect of dTAG-13 on the sensitivity of MIA PaCa-2 cells to MEK162.**

**A**, Parental MIA PaCa-2 cells were treated with different concentrations of MEK162 in the absence or presence of 2.5 µM of Mek5i or Erk5i. Then, cell numbers were estimated with the crystal violet staining assay.

**B**, BxPC-3, HPAF-II or cultures from P-PDX #27 were treated with vehicle or Erk5i and the indicated concentrations of MEK162. Cell numbers were quantified as described in A.

**C**, Analysis by Western blot of lysates from MIA PaCa-2 cells transfected with and empty vector or the same vector encoding FKBPF36V-Slug.

**D**, The same cells as in C were treated with different concentrations of MEK162. Then, cell numbers were quantified as described in A.

**E**, MIA PaCa-2 cells were treated with different concentrations of MEK162 and dTAG-13 as indicated. Cell numbers were quantified as described in A.

**F**, MIA PaCa-2 cells transfected with a vector encoding Slug-FKBPF36V cells were injected subcutaneously into BALB-c Nude mice. Mice were treated with vehicle or MEK162. Tumor growth was monitored by assessing volumes.

**G**, The levels of Slug or pErk1/2 (upper panels) or active Caspase-3 (lower panels) were analyzed by immunohistochemistry on tumors obtained at the of the experiment shown in Fig. 7I.

Results are presented as mean ± SD.
